# Supplementary material for: Polycystic ovarian syndrome (PCOS) and recurrent spontaneous abortion (RSA) are associated with the PI3K-AKT pathway activation
Source: PeerJ journal article supplement (doi:10.7717/peerj.17950), 2024-09-06

**A**Scale Free Topology Model Fit, signed  $R^2$ **Scale independence**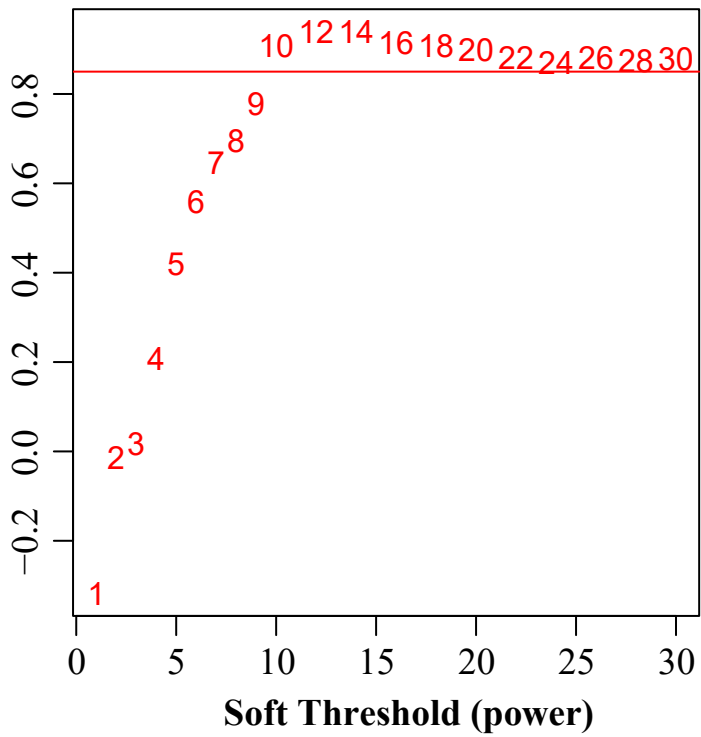**Mean connectivity**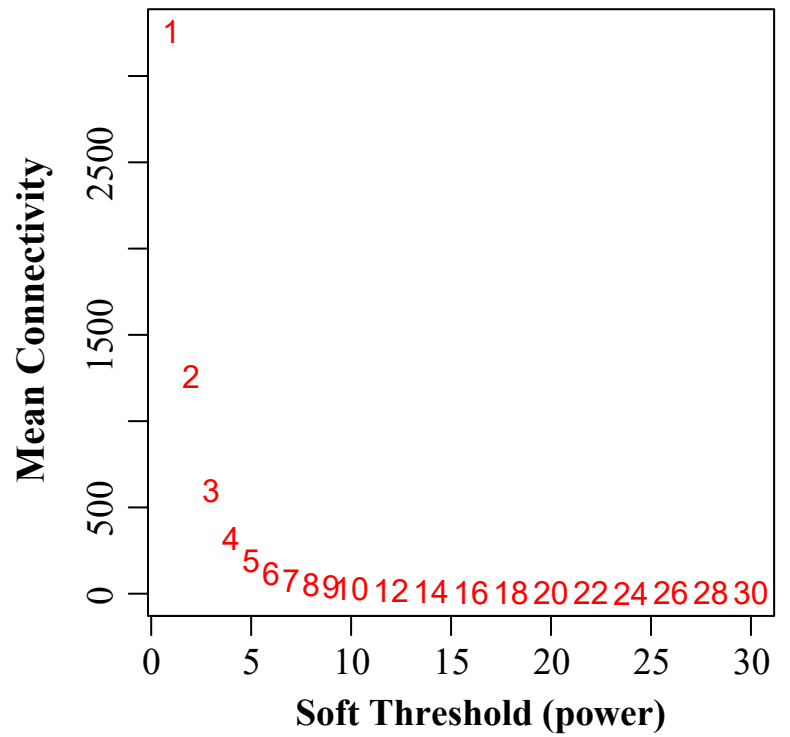**B****Cluster Dendrogram**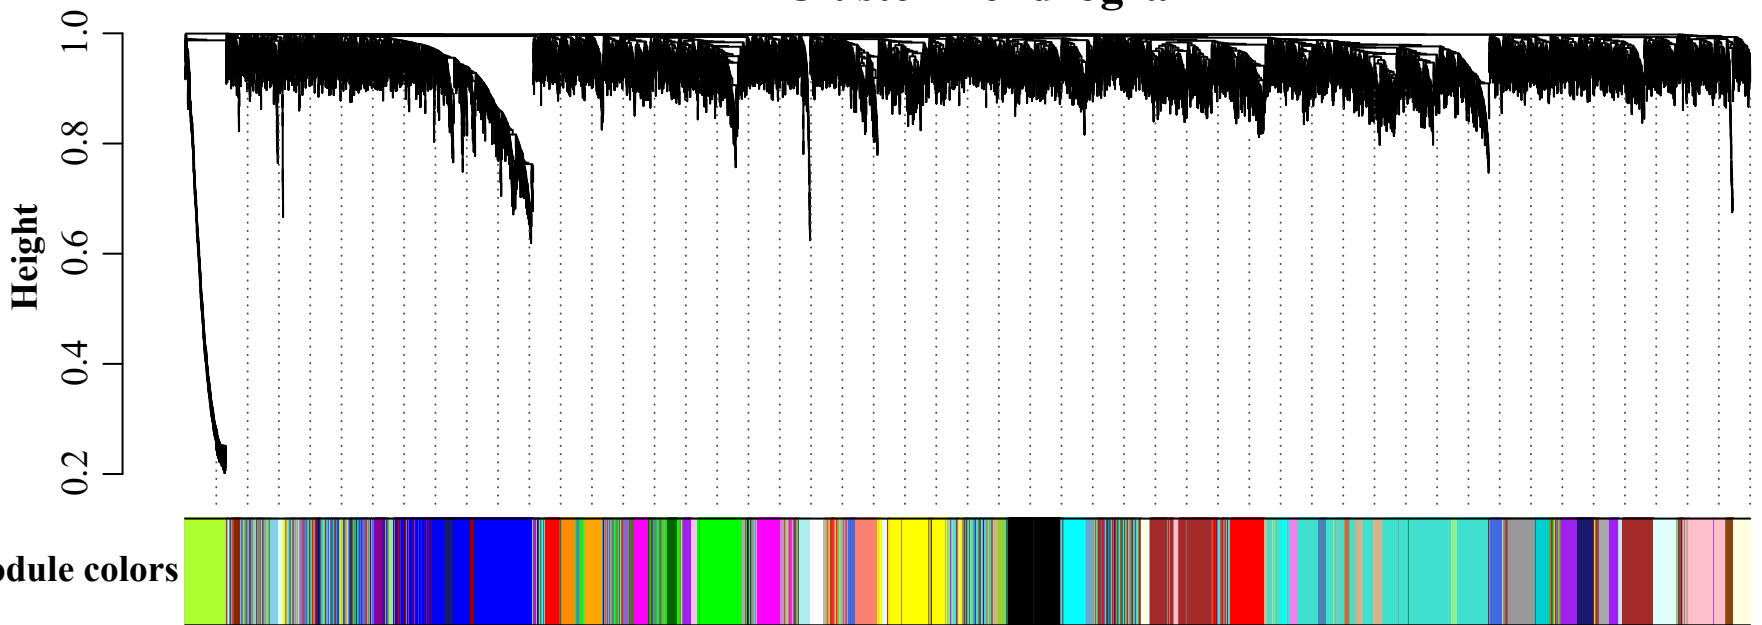**C**Scale Free Topology Model Fit, signed  $R^2$ **Scale independence**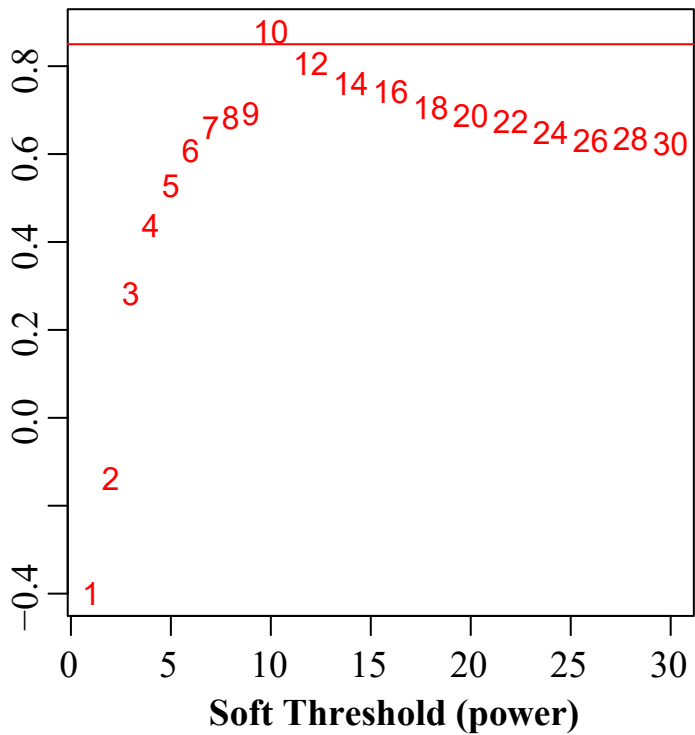**Mean connectivity**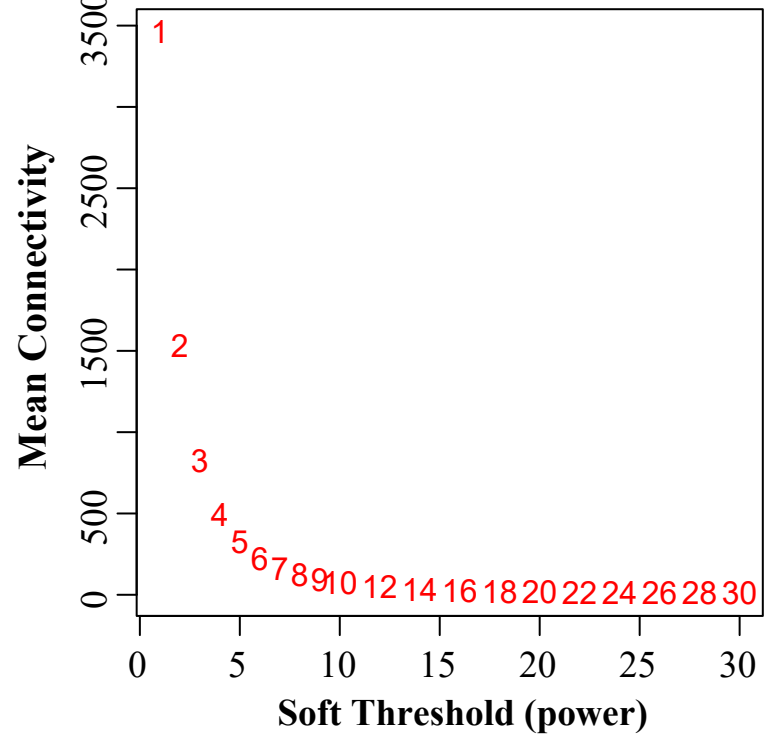**D****Cluster Dendrogram**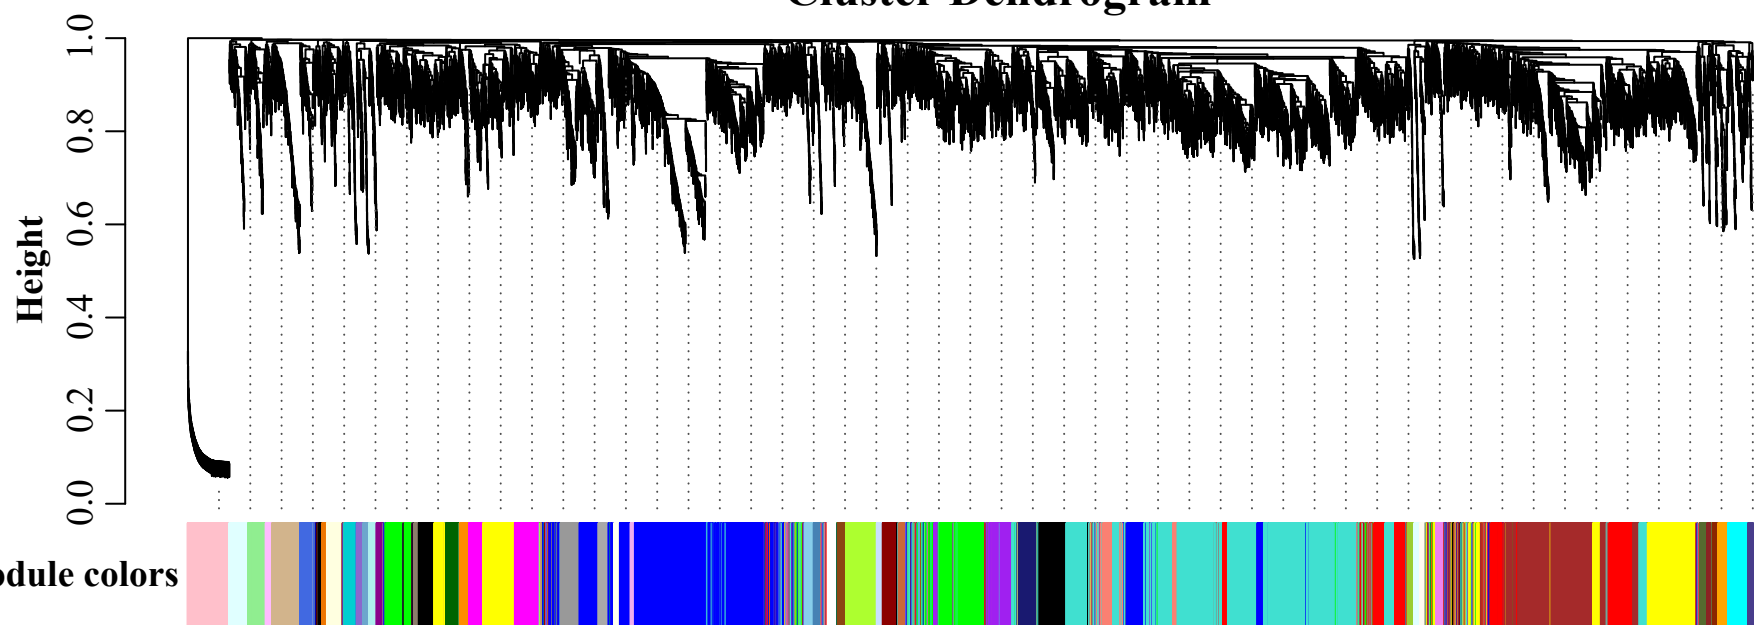

Supplement: Figure_S1.pdf [file Figure_S1.pdf]
