# Supplementary material for: Polycystic ovarian syndrome (PCOS) and recurrent spontaneous abortion (RSA) are associated with the PI3K-AKT pathway activation
Source: PeerJ journal article supplement (doi:10.7717/peerj.17950), 2024-09-06

**A**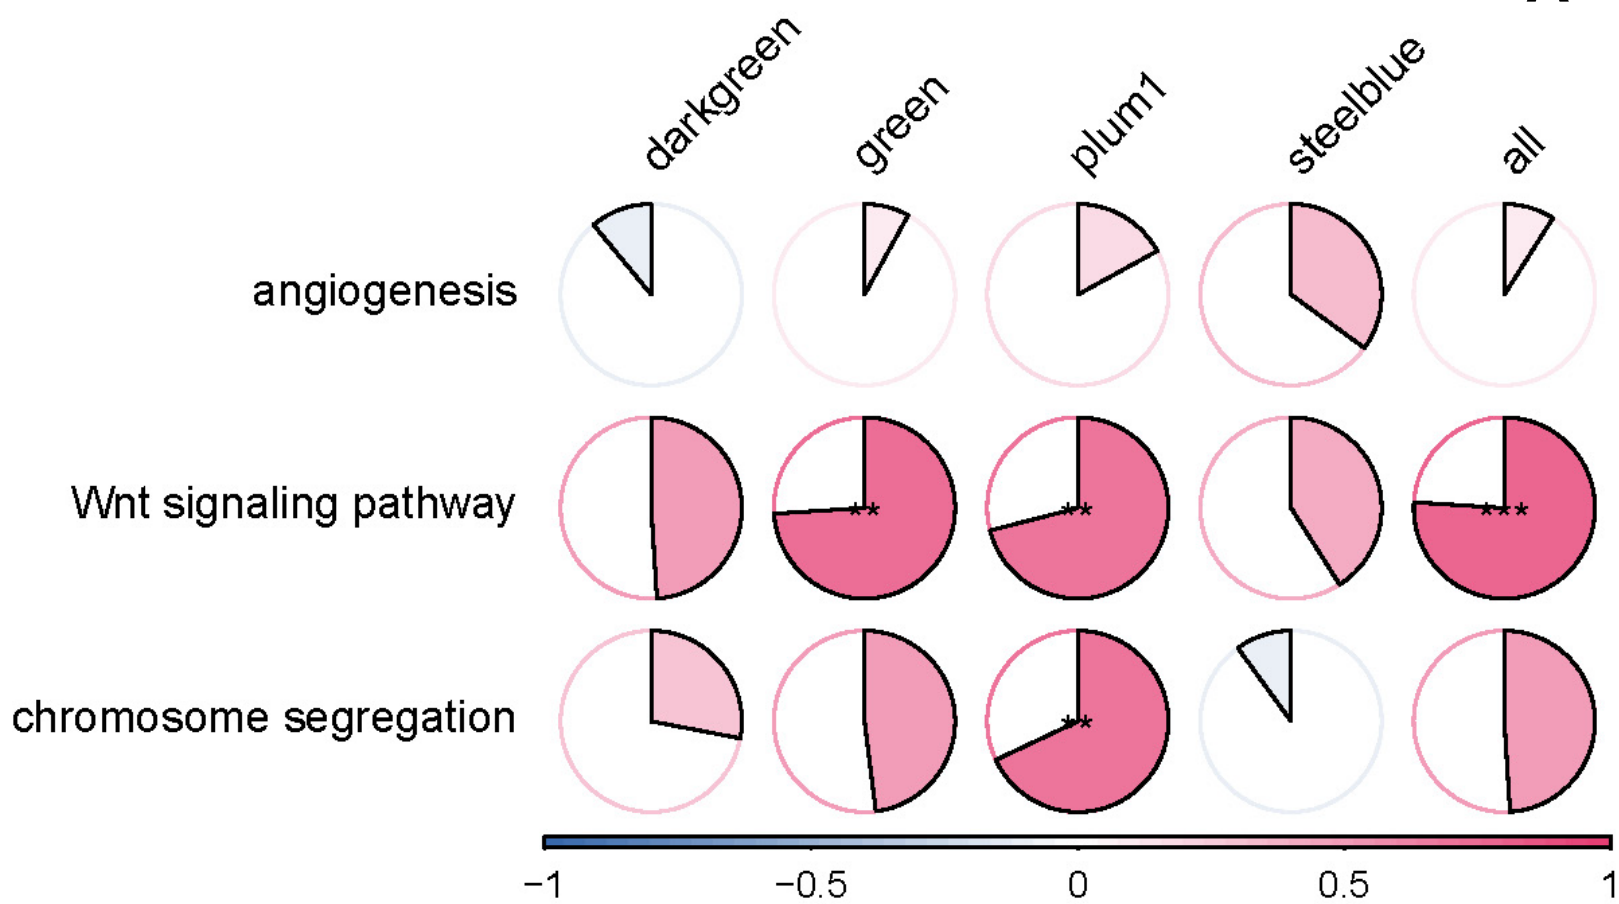**B**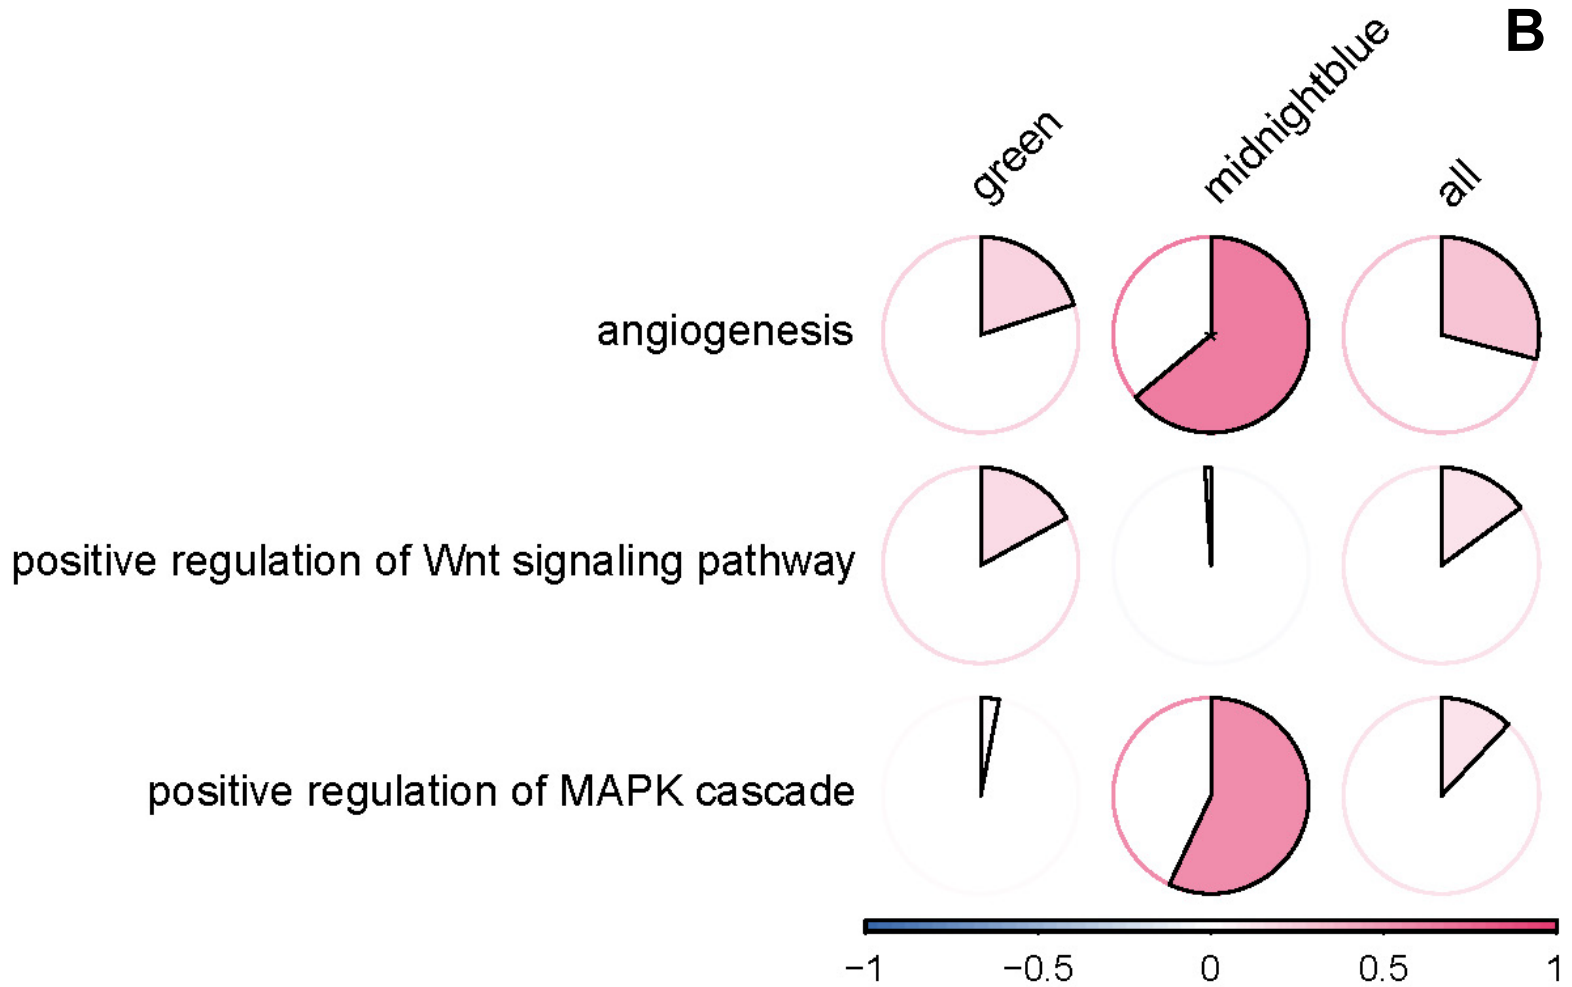

Supplement: Figure_S2.pdf [file Figure_S2.pdf]
