# Supplementary material for: Polycystic ovarian syndrome (PCOS) and recurrent spontaneous abortion (RSA) are associated with the PI3K-AKT pathway activation
Source: PeerJ. 2024 Sep 6;12:e17950. doi: 10.7717/peerj.17950 (PMC11382649; doi:10.7717/peerj.17950)
Supplement: Supplemental Information 3 [file peerj-12-17950-s003.xls]

## Sheet: Sheet1
ITEM TO CHECK	IMPORTANCE	CHECKLIST
EXPERIMENTAL DESIGN
Definition of experimental and control groups	E	page8 line159-165
Number within each group	E	page8 line159-165
Assay carried out by core lab or investigator's lab?	D	NA
Acknowledgement of authors' contributions	D	NA
SAMPLE
Description	E	page8 line159-165
Volume/mass of sample processed	D	NA
Microdissection or macrodissection	E	page8 line166-171
Processing procedure	E	page8 line166-171
If frozen - how and how quickly?	E	page8 line166-171
If fixed - with what, how quickly?	E	page8 line166-171
Sample storage conditions and duration (especially for FFPE samples)	E	page8 line166-171
NUCLEIC ACID EXTRACTION
Procedure and/or instrumentation	E	page8 line166-171
Name of kit and details of any modifications	E	page8 line166-171
Source of additional reagents used	D	NA
Details of DNase or RNAse treatment	E	page8 line166-171
Contamination assessment (DNA or RNA)	E	page8 line166-171
Nucleic acid quantification	E	page8 line166-171
Instrument and method	E	page8 line166-171
Purity (A260/A280)	D	NA
Yield	D	NA
RNA integrity method/instrument	E	page8 line166-171
RIN/RQI or Cq of 3' and 5' transcripts	E	page8 line166-171
Electrophoresis traces	D	NA
Inhibition testing (Cq dilutions, spike or other)	E	page8 line166-171
REVERSE TRANSCRIPTION
Complete reaction conditions	E	page8 line166-171
Amount of RNA and reaction volume	E	page8 line166-171
Priming oligonucleotide (if using GSP) and concentration	E	page8 line166-171
Reverse transcriptase and concentration	E	page8 line166-171
Temperature and time	E	page8 line166-171
Manufacturer of reagents and catalogue numbers	D	NA
Cqs with and without RT	D*	NA
Storage conditions of cDNA	D	NA
qPCR TARGET INFORMATION
If multiplex, efficiency and LOD of each assay.	E	page8 line166-171
Sequence accession number	E	page8 line166-171
Location of amplicon	D	NA
Amplicon length	E	page8 line166-171
In silico specificity screen (BLAST, etc)	E	page8 line166-171
Pseudogenes, retropseudogenes or other homologs?	D	NA
Sequence alignment	D	NA
Secondary structure analysis of amplicon	D	NA
Location of each primer by exon or intron (if applicable)	E	page8 line166-171
What splice variants are targeted?	E	page8 line166-171
qPCR OLIGONUCLEOTIDES
Primer sequences	E	page8 line166-171
RTPrimerDB Identification Number	D	NA
Probe sequences	D**	NA
Location and identity of any modifications	E	page8 line166-171
Manufacturer of oligonucleotides	D	NA
Purification method	D	NA
qPCR PROTOCOL
Complete reaction conditions	E	page8 line166-171
Reaction volume and amount of cDNA/DNA	E	page8 line166-171
Primer, (probe), Mg++ and dNTP concentrations	E	page8 line166-171
Polymerase identity and concentration	E	page8 line166-171
Buffer/kit identity and manufacturer	E	page8 line166-171
Exact chemical constitution of the buffer	D	NA
Additives (SYBR Green I, DMSO, etc.)	E	page8 line166-171
Manufacturer of plates/tubes and catalog number	D	NA
Complete thermocycling parameters	E	page8 line166-171
Reaction setup (manual/robotic)	D	NA
Manufacturer of qPCR instrument	E	page8 line166-171
qPCR VALIDATION
Evidence of optimisation (from gradients)	D	NA
Specificity (gel, sequence, melt, or digest)	E	page8 line166-171
For SYBR Green I, Cq of the NTC	E	page8 line166-171
Standard curves with slope and y-intercept	E	page8 line166-171
PCR efficiency calculated from slope	E	page8 line166-171
Confidence interval for PCR efficiency or standard error	D	NA
r2 of standard curve	E	page8 line166-171
Linear dynamic range	E	page8 line166-171
Cq variation at lower limit	E	page8 line166-171
Confidence intervals throughout range	D	NA
Evidence for limit of detection	E	page8 line166-171
If multiplex, efficiency and LOD of each assay.	E	page8 line166-171
DATA ANALYSIS
qPCR analysis program (source, version)	E	page8 line166-171
Cq method determination	E	page8 line166-171
Outlier identification and disposition	E	page8 line166-171
Results of NTCs	E	page8 line166-171
Justification of number and choice of reference genes	E	page8 line166-171
Description of normalisation method	E	page8 line166-171
Number and concordance of biological replicates	D	NA
Number and stage (RT or qPCR) of technical replicates	E	page8 line166-171
Repeatability (intra-assay variation)	E	page8 line166-171
Reproducibility (inter-assay variation, %CV)	D	NA
Power analysis	D	NA
Statistical methods for result significance	E	page8 line166-171
Software (source, version)	E	page8 line166-171
Cq or raw data submission using RDML	D	NA
Table 1. MIQE checklist for authors, reviewers and editors. All essential information (E) must be submitted with the manuscript. Desirable
information (D) should be submitted if available. If using primers obtained from RTPrimerDB, information on qPCR target, oligonucleotides,
protocols and validation is available from that source.
*: Assessing the absence of DNA using a no RT assay is essential when first extracting RNA. Once the sample has been validated as
RDNA-free, inclusion of a no-RT control is desirable, but no longer essential.
**: Disclosure of the probe sequence is highly desirable and strongly encouraged. However, since not all commercial pre-designed assay
vendors provide this information, it cannot be an essential requirement. Use of such assays is advised against.
